# Supplementary material
Source: HighWire-hosted journal article supplement (https://erj.ersjournals.com/content/55/6/1901346)
Supplement: inline-supplementary-material-2 [file inline-supplementary-material-2.pdf]

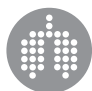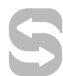

SHAREABLE PDF

# TRIM33 prevents pulmonary fibrosis by impairing TGF- $\beta$ 1 signalling

Pierre-Marie Boutanquoi<sup>1</sup>, Olivier Burgy<sup>1,2</sup>, Guillaume Beltramo<sup>1,3,4</sup>, Pierre-Simon Bellaye<sup>5</sup>, Lucile Dondaine<sup>1,4</sup>, Guillaume Marcion<sup>1</sup>, Lenny Pommerolle<sup>1</sup>, Aurélie Vadel<sup>6</sup>, Maximilien Spanjaard<sup>1,3</sup>, Oleg Demidov <sup>1</sup>, Arnaud Mailleux <sup>6</sup>, Bruno Crestani<sup>6</sup>, Martin Kolb <sup>7</sup>, Carmen Garrido<sup>1</sup>, Françoise Goirand<sup>1,8</sup> and Philippe Bonniaud<sup>1,3,4,8</sup>

**Affiliations:** <sup>1</sup>INSERM U1231, Faculty of Medicine and Pharmacy, University of Bourgogne-Franche Comté, Dijon, France. <sup>2</sup>Division of Pulmonary Sciences and Critical Care Medicine, Dept of Medicine, University of Colorado Denver, Aurora, CO, USA. <sup>3</sup>Dept of Pulmonary Medicine and Intensive Care Unit, University Hospital, Bourgogne-Franche Comté, Dijon, France. <sup>4</sup>Reference Center for Rare Lung Diseases, University Hospital, Bourgogne-Franche Comté, Dijon, France. <sup>5</sup>Cancer Center Georges François Leclerc, Dijon, France. <sup>6</sup>INSERM U1152, Faculty of Medicine, University of Bichat, Paris, France. <sup>7</sup>McMaster University, Hamilton, ON, Canada. <sup>8</sup>These authors codirected this work and contributed equally to this work.

**Correspondence:** Philippe Bonniaud, Dept of Pulmonary Medicine and Intensive Care Unit, University Hospital, 21079 Dijon, France. E-mail: philippe.bonniaud@chu-dijon.fr

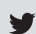

@ERSpublications

TRIM33 has a protective role against fibrogenesis, inhibiting the TGF- $\beta$ 1 pathway through a direct association with HSPB5. Interactions between TRIM33, SMAD4 and HSPB5 may represent key targets to prevent the progression of pulmonary fibrosis. <http://bit.ly/3aVCuxc>

**Cite this article as:** Boutanquoi P-M, Burgy O, Beltramo G, *et al.* TRIM33 prevents pulmonary fibrosis by impairing TGF- $\beta$ 1 signalling. *Eur Respir J* 2020; 55: 1901346 [<https://doi.org/10.1183/13993003.01346-2019>].

This single-page version can be shared freely online.

## ABSTRACT

**Background:** Idiopathic pulmonary fibrosis (IPF) is a devastating disease characterised by myofibroblast proliferation and abnormal extracellular matrix accumulation in the lungs. Transforming growth factor (TGF)- $\beta$ 1 initiates key profibrotic signalling involving the SMAD pathway and the small heat shock protein B5 (HSPB5). Tripartite motif-containing 33 (TRIM33) has been reported to negatively regulate TGF- $\beta$ /SMAD signalling, but its role in fibrogenesis remains unknown. The objective of this study was to elucidate the role of TRIM33 in IPF.

**Methods:** TRIM33 expression was assessed in the lungs of IPF patients and rodent fibrosis models. Bone marrow-derived macrophages (BMDM), primary lung fibroblasts and 3D lung tissue slices were isolated from *Trim33*-floxed mice and cultured with TGF- $\beta$ 1 or bleomycin (BLM). *Trim33* expression was then suppressed by adenovirus Cre recombinase (AdCre). Pulmonary fibrosis was evaluated in haematopoietic-specific *Trim33* knockout mice and in *Trim33*-floxed mice that received AdCre and BLM intratracheally.

**Results:** TRIM33 was overexpressed in alveolar macrophages and fibroblasts in IPF patients and rodent fibrotic lungs. *Trim33* inhibition in BMDM increased TGF- $\beta$ 1 secretion upon BLM treatment. Haematopoietic-specific *Trim33* knockout sensitised mice to BLM-induced fibrosis. In primary lung fibroblasts and 3D lung tissue slices, *Trim33* deficiency increased expression of genes downstream of TGF- $\beta$ 1. In mice, AdCre-*Trim33* inhibition worsened BLM-induced fibrosis. *In vitro*, HSPB5 was able to bind directly to TRIM33, thereby diminishing its protein level and TRIM33/SMAD4 interaction.

**Conclusion:** Our results demonstrate a key role of TRIM33 as a negative regulator of lung fibrosis. Since TRIM33 directly associates with HSPB5, which impairs its activity, inhibitors of TRIM33/HSPB5 interaction may be of interest in the treatment of IPF.
